# Supplementary material for: Total syntheses of fully lipidated glycosylphosphatidylinositol anchors of Toxoplasma gondii
Source: Royal Society of Chemistry journal article supplement (doi:10.1039/b501373a), 2005-01-01

# Supplementary Information

## Total Synthesis of Fully Lipidated Glycosylphosphatidylinositol Anchors of *Toxoplasma gondii*

Yong-Uk Kwon, Xinyu Liu and Peter H. Seeberger\*

*Laboratorium für Organische Chemie, ETH Zürich, 8093 Zürich, Switzerland.  
Tel: 41-1-633-3121; Fax: 41-1-633-1235; E-mail: seeberger@org.chem.ethz.ch*

**General Information:**  $^1\text{H}$ ,  $^{13}\text{C}$  and  $^{31}\text{P}$  NMR spectra were recorded on a Varian Mercury 300 (300 MHz) or Varian Gemini 300 (300 MHz) spectrometer in  $\text{CDCl}_3$  with chemical shifts referenced to internal standards  $\text{CDCl}_3$  (7.26 ppm  $^1\text{H}$ , 77.0 ppm  $^{13}\text{C}$ ) unless noted otherwise.  $^{31}\text{P}$  spectra are reported in  $\delta$  value relative to  $\text{H}_3\text{PO}_4$  (0.0 ppm) as an external reference. High-resolution mass spectral analyses (ESI or MALDI) were performed by the MS-service at the Laboratorium für Organische Chemie at ETH Zürich.

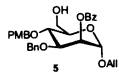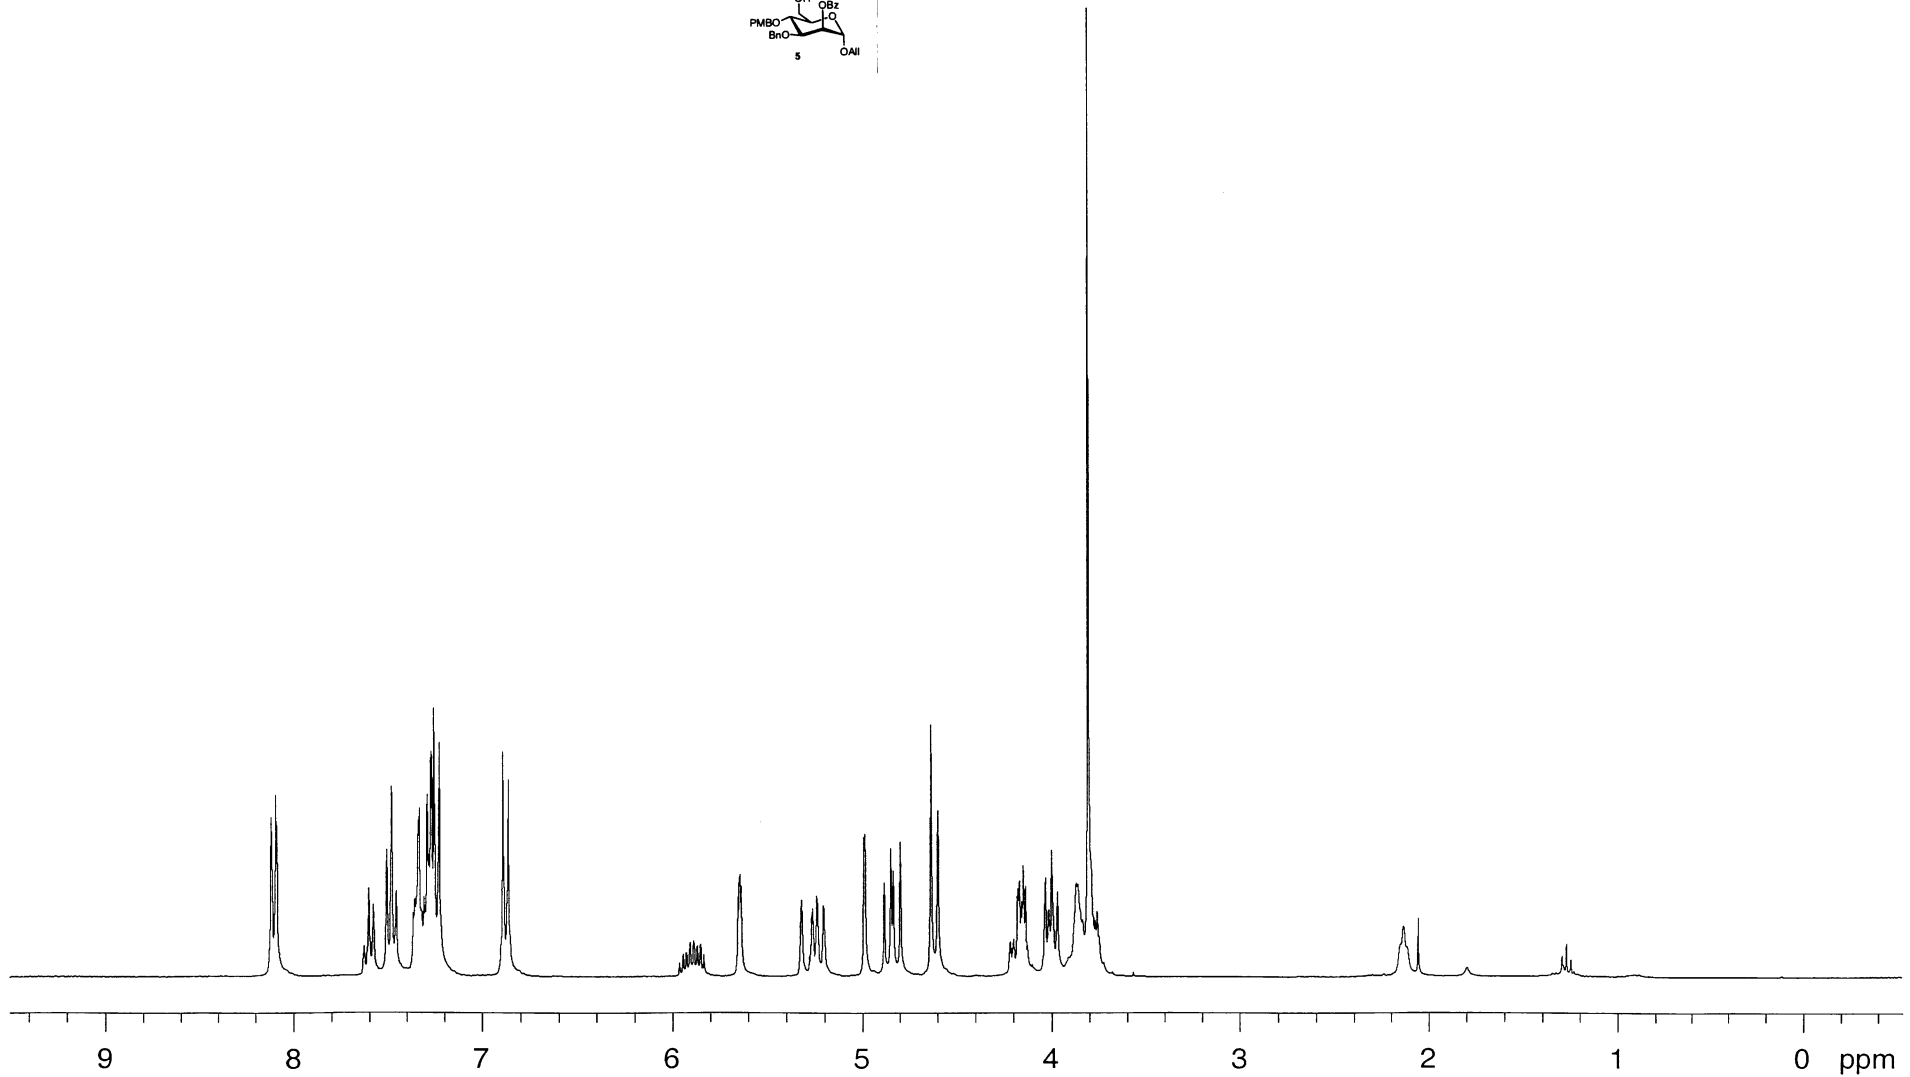

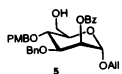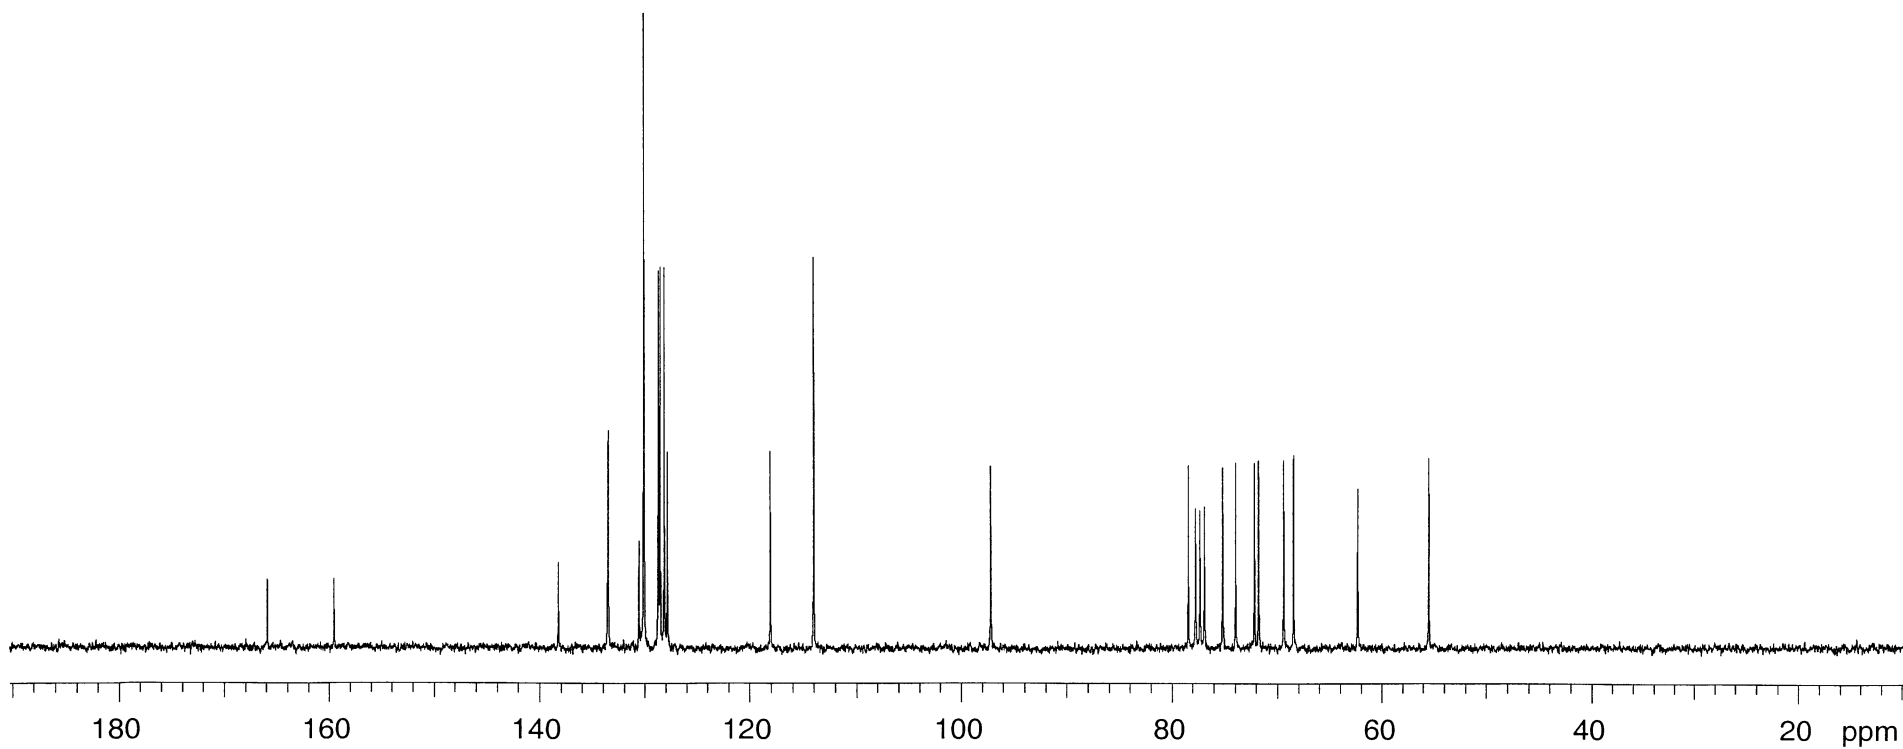

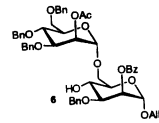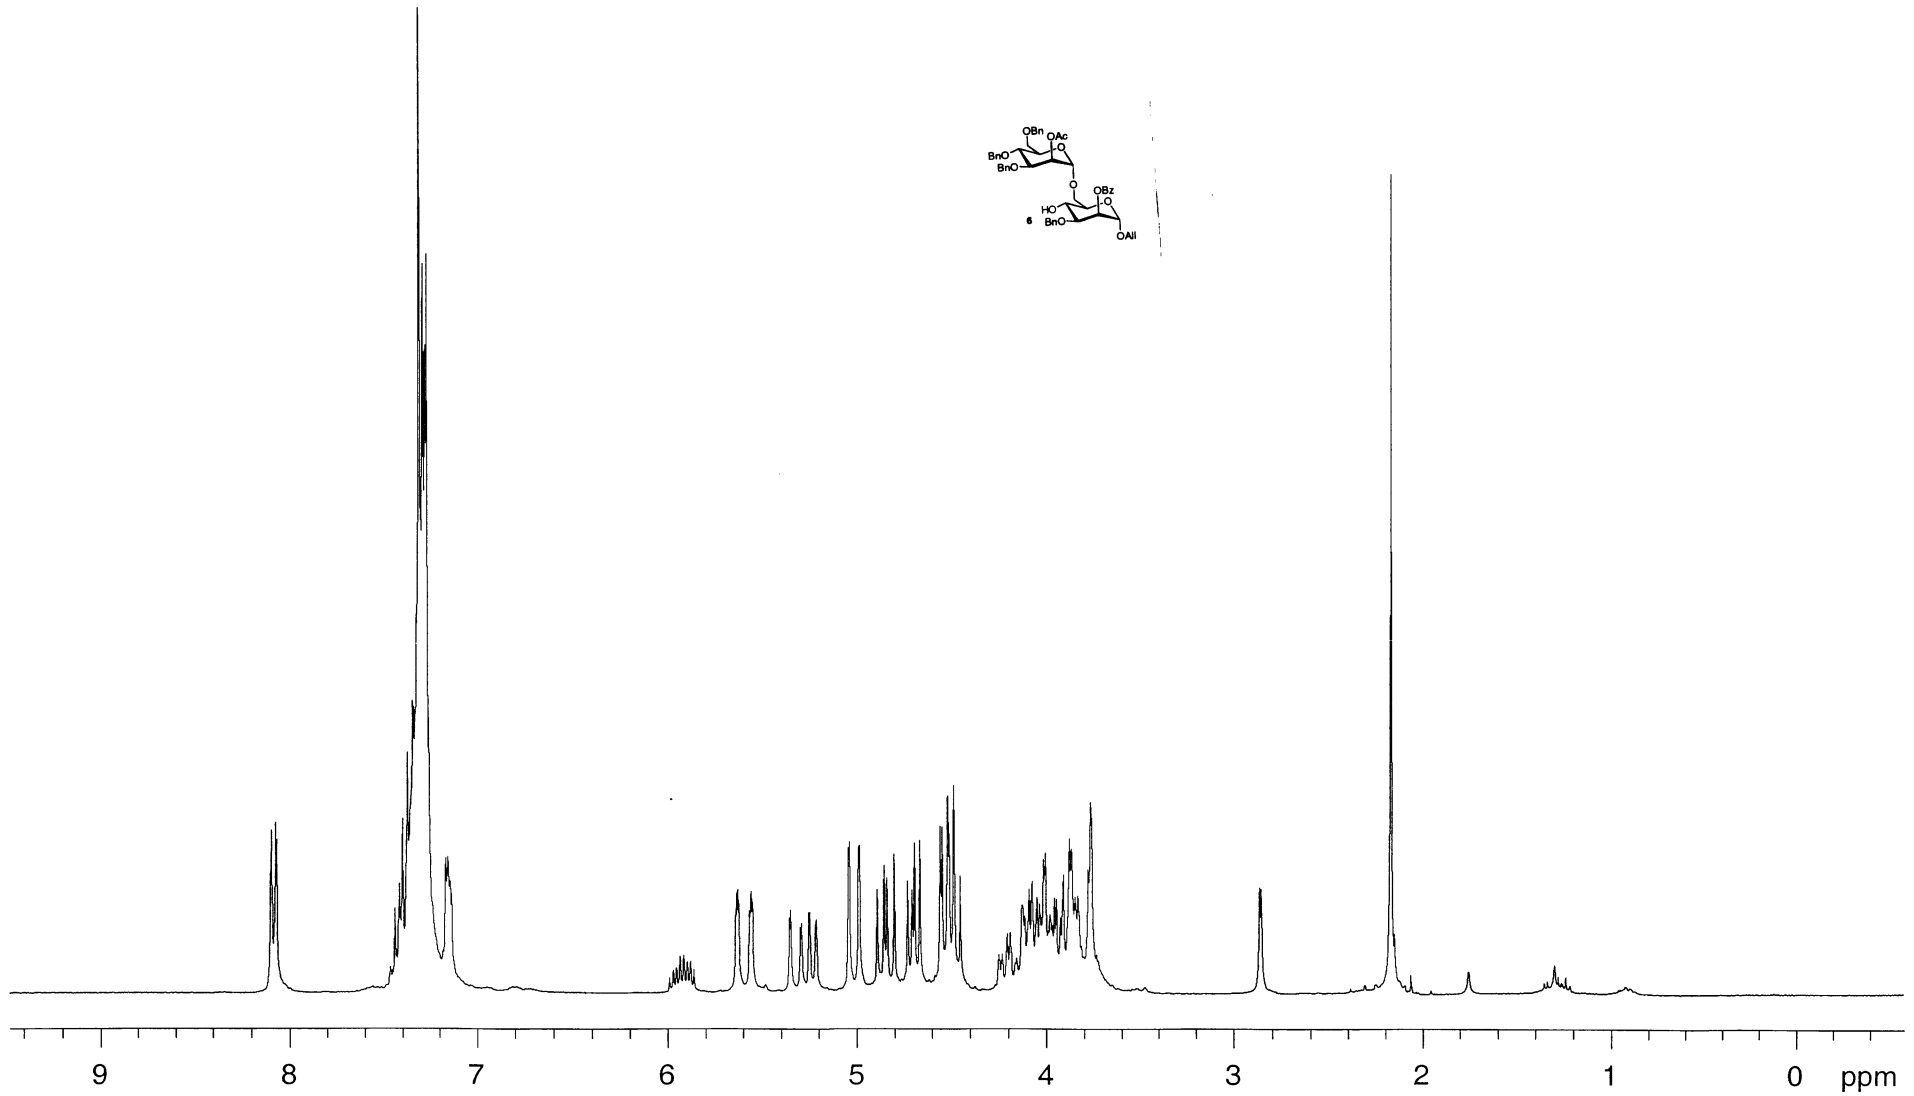

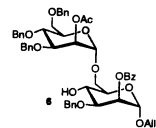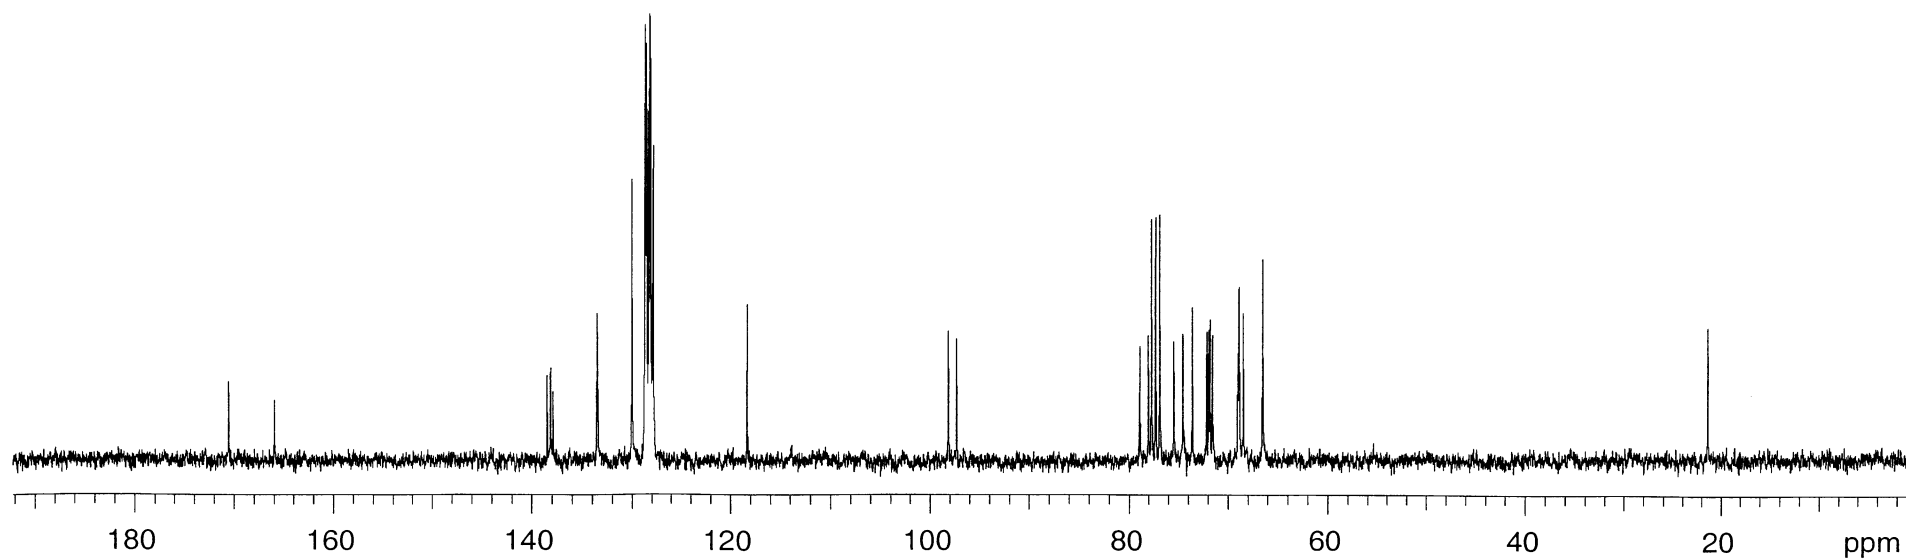

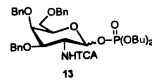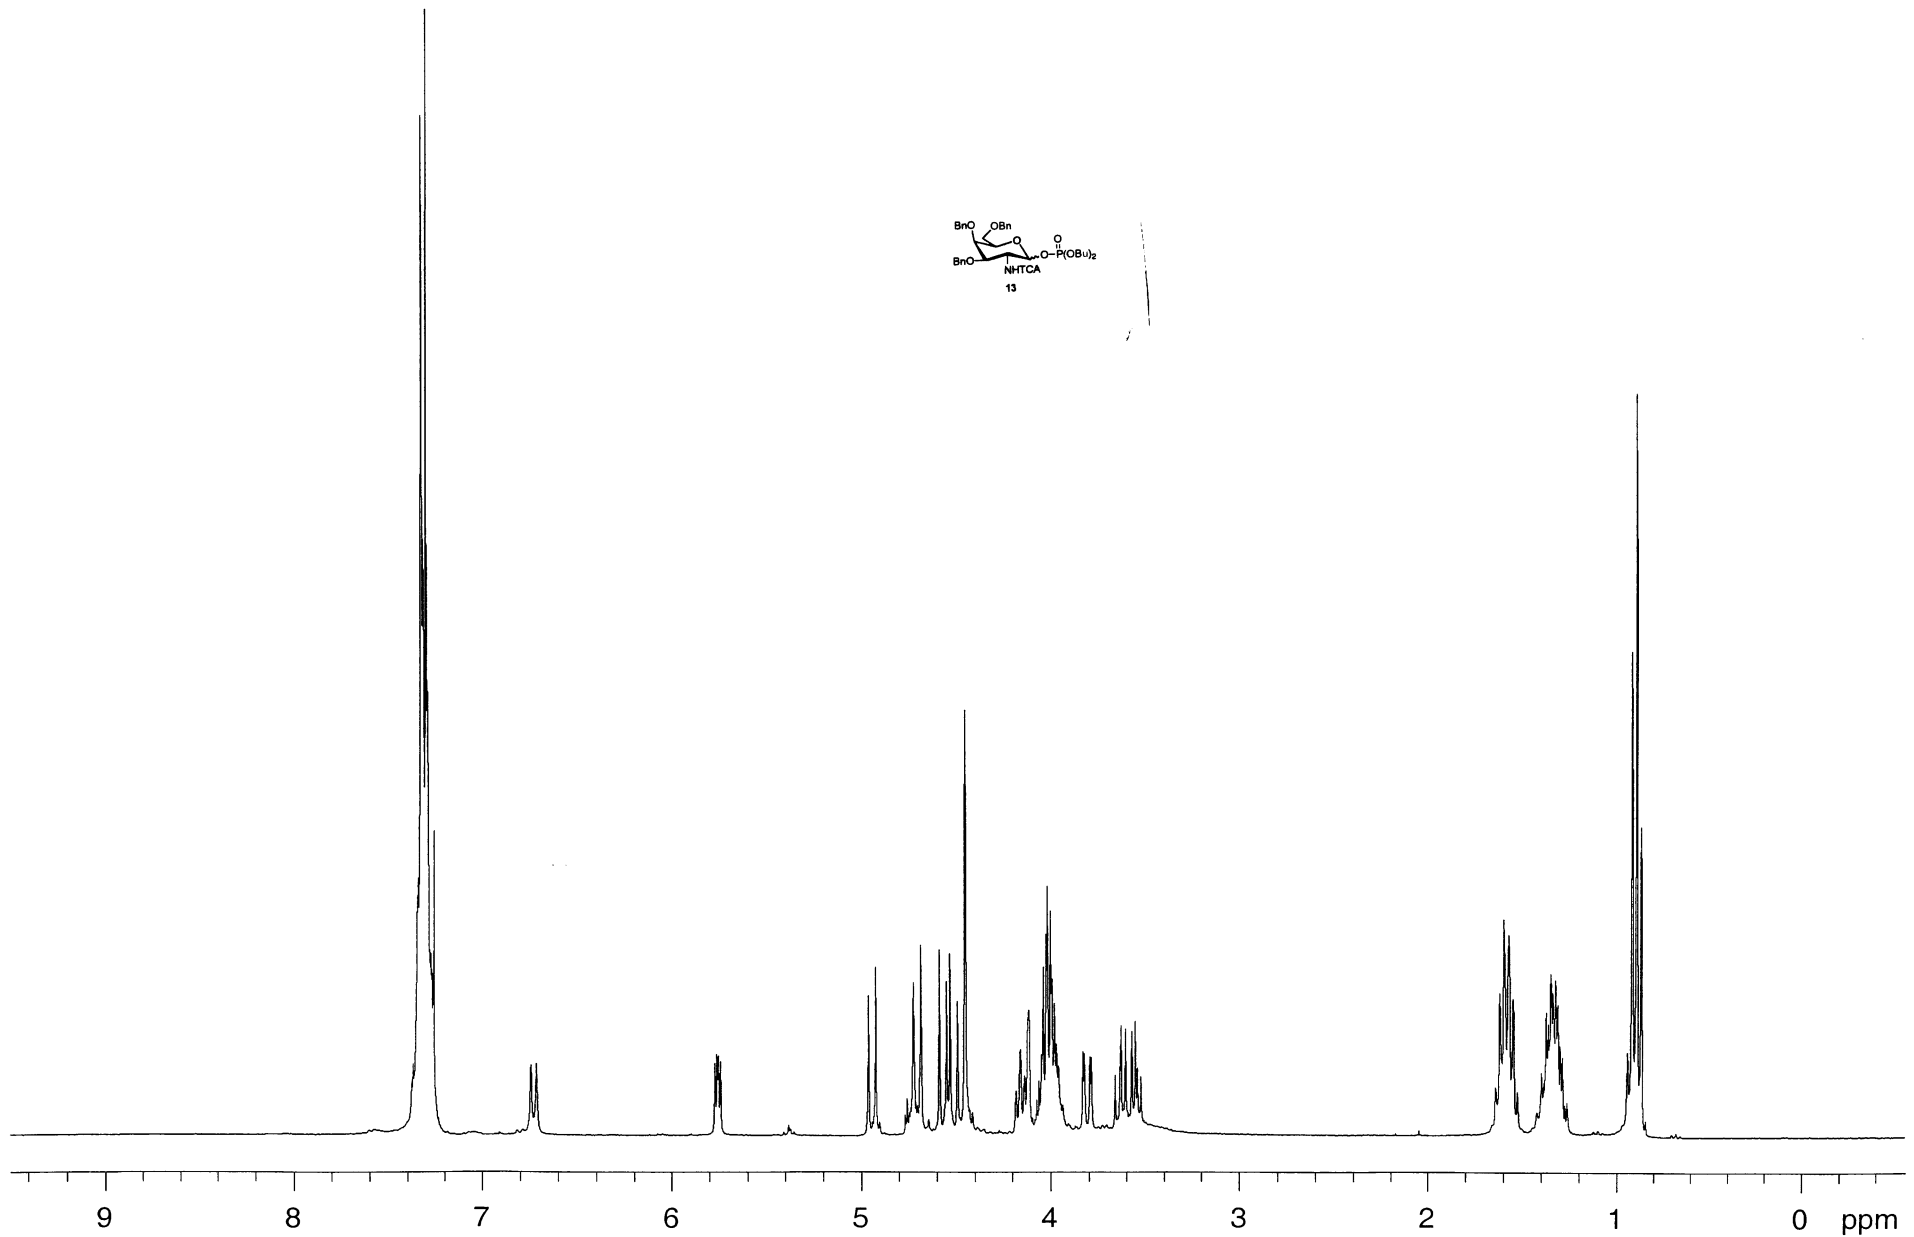

Supplement: b501373a.pdf [file b501373a.pdf]
